# Supplementary figures and images for: Inhibitory effects of crocin on breast cancer cell proliferation and apoptosis: Mediation via downregulation of ERα and suppression of p38 MAPK/Akt signaling pathways
Source: Research Square preprint supplement (doi:10.21203/rs.3.rs-6338876/v1), 2025-05-13

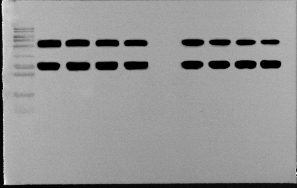


**Figure 1 p-AKT**


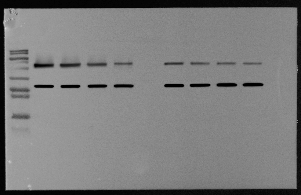


**Figure 2ERA**


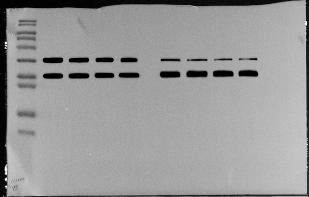


**Figure 3P-P38**

Supplement: Supplementary file 1 [file 2fad6af38e61179a3862098c.docx]
